# Supplementary material for: Analysis of an intense O 3 pollution episode in the Atlantic Coast of the Iberian Peninsula using photochemical modelling: characterization of transport pathways and accumulation processes
Source: Copernicus journal article supplement (doi:10.5194/egusphere-2023-387), 2023-09-15
Supplement: Supplementary file 1 [file egusphere-2023-387-supplement.pdf]

**Table S1. Vertical levels for the WRF simulation.**

| Level | $\eta$ | Approximate height of the midpoint of the layer AGL (m) | Level | $\eta$ | Approximate height of the midpoint of the layer AGL (m) |
|-------|--------|---------------------------------------------------------|-------|--------|---------------------------------------------------------|
| 0     | 1.0000 | 0                                                       | 16    | 0.7100 | 2,341                                                   |
| 1     | 0.9975 | 10                                                      | 17    | 0.6100 | 3,130                                                   |
| 2     | 0.9950 | 30                                                      | 18    | 0.5100 | 4,272                                                   |
| 3     | 0.9925 | 50                                                      | 19    | 0.4100 | 5,563                                                   |
| 4     | 0.9900 | 70                                                      | 20    | 0.3600 | 6,635                                                   |
| 5     | 0.9875 | 90                                                      | 21    | 0.2950 | 7,568                                                   |
| 6     | 0.9850 | 110                                                     | 22    | 0.2550 | 8,490                                                   |
| 7     | 0.9800 | 140                                                     | 23    | 0.2200 | 9,215                                                   |
| 8     | 0.9700 | 200                                                     | 24    | 0.1900 | 9,894                                                   |
| 9     | 0.9550 | 301                                                     | 25    | 0.1650 | 10,511                                                  |
| 10    | 0.9350 | 444                                                     | 26    | 0.1450 | 11,052                                                  |
| 11    | 0.9100 | 631                                                     | 27    | 0.1250 | 11,566                                                  |
| 12    | 0.8800 | 864                                                     | 28    | 0.1050 | 12,118                                                  |
| 13    | 0.8450 | 1,145                                                   | 29    | 0.0800 | 12,800                                                  |
| 14    | 0.8100 | 1,458                                                   | 30    | 0.0500 | 13,740                                                  |
| 15    | 0.7600 | 1,854                                                   | 31    | 0.0000 | 15,467                                                  |

5 **Table S2. Summary of WRF parameterizations.**

| Parameter           | Option                                                         |
|---------------------|----------------------------------------------------------------|
| Shortwave Radiation | MM5 Shortwave radiation scheme<br>(Dudhia, 1989)               |
| Longwave Radiation  | Rapid Radiative Transfer Model (RRTM)<br>(Mlawer et al., 1997) |
| Surface Model       | Noah LSM<br>(Alapaty et al., 2008)                             |
| Microphysics        | WSM6<br>(Hong & Lim, 2006)                                     |
| PBL                 | Yonsei University (YSU)<br>(Hong, Noh & Dudhia, 2006)          |
| SST                 | OISST (Reynolds et al., 2007)                                  |

**Table S3. CAMx and WRF correspondence levels.**

| CAMx level | WRF level | Approximate height of the layer interface AGL (m) |
|------------|-----------|---------------------------------------------------|
| 1          | 1         | 20                                                |
| 2          | 2         | 40                                                |
| 3          | 3         | 60                                                |
| 4          | 4         | 80                                                |
| 5          | 7         | 160                                               |
| 6          | 8         | 220                                               |
| 7          | 9         | 350                                               |
| 8          | 10        | 530                                               |
| 9          | 11        | 730                                               |
| 10         | 12        | 1,000                                             |
| 11         | 14        | 1,600                                             |
| 12         | 16        | 2,500                                             |
| 13         | 17        | 3,600                                             |
| 14         | 18        | 4,800                                             |

**Table S4. Statistical metrics for the selected O<sub>3</sub> measurement stations with its codification and location coordinates in Northern Atlantic Iberia (NAI). The station of Valderejo in the Valderejo Natural Park (VNP) is highlighted in gray.**

| Station Code   | Latitude (degrees) | Longitude (degrees) | MB ( $\mu\text{g}\cdot\text{m}^{-3}$ ) | ME ( $\mu\text{g}\cdot\text{m}^{-3}$ ) | NMB       | IOA         | r           |
|----------------|--------------------|---------------------|----------------------------------------|----------------------------------------|-----------|-------------|-------------|
| ES0005R        | 42.72              | -8.92               | 3                                      | 15                                     | 4%        | 0.82        | 0.72        |
| ES0008R        | 43.44              | -4.85               | 7                                      | 12                                     | 10%       | 0.76        | 0.67        |
| ES0016R        | 42.63              | -7.70               | 26                                     | 27                                     | 46%       | 0.57        | 0.44        |
| ES0094A        | 43.41              | -7.99               | 5                                      | 16                                     | 6%        | 0.77        | 0.61        |
| ES0201A        | 43.45              | -7.85               | 13                                     | 26                                     | 25%       | 0.67        | 0.53        |
| ES0339A        | 43.69              | -7.51               | 32                                     | 32                                     | 66%       | 0.43        | 0.57        |
| ES0354A        | 42.88              | -6.44               | 41                                     | 41                                     | 80%       | 0.45        | 0.49        |
| ES0360A        | 42.78              | -6.60               | 16                                     | 21                                     | 21%       | 0.61        | 0.48        |
| ES0365A        | 42.70              | -4.83               | 9                                      | 28                                     | 12%       | 0.52        | 0.47        |
| ES0373A        | 42.63              | -6.52               | 14                                     | 22                                     | 20%       | 0.63        | 0.44        |
| ES0377A        | 42.61              | -6.64               | 12                                     | 23                                     | 17%       | 0.70        | 0.59        |
| ES0587A        | 43.32              | -3.11               | 4                                      | 21                                     | 6%        | 0.80        | 0.64        |
| ES0761A        | 42.72              | -5.64               | 27                                     | 28                                     | 44%       | 0.61        | 0.61        |
| ES0824A        | 43.31              | -5.71               | 24                                     | 33                                     | 47%       | 0.61        | 0.45        |
| ES0825A        | 43.31              | -5.69               | 27                                     | 34                                     | 55%       | 0.58        | 0.42        |
| ES0879A        | 43.55              | -5.90               | -3                                     | 20                                     | -5%       | 0.70        | 0.50        |
| ES0880A        | 43.55              | -5.92               | -4                                     | 24                                     | -8%       | 0.59        | 0.35        |
| ES0901A        | 43.24              | -8.32               | 20                                     | 25                                     | 36%       | 0.77        | 0.76        |
| ES0961A        | 42.43              | -8.68               | 6                                      | 29                                     | 7%        | 0.64        | 0.56        |
| ES1038A        | 43.35              | -4.06               | 33                                     | 36                                     | 67%       | 0.60        | 0.52        |
| ES1137A        | 42.22              | -8.74               | 26                                     | 34                                     | 44%       | 0.62        | 0.49        |
| ES1138A        | 43.37              | -8.42               | 26                                     | 31                                     | 62%       | 0.53        | 0.42        |
| ES1175A        | 42.72              | -7.45               | 35                                     | 38                                     | 69%       | 0.49        | 0.20        |
| ES1268A        | 43.36              | -5.87               | -12                                    | 28                                     | -19%      | 0.71        | 0.54        |
| ES1269A        | 43.37              | -5.83               | 3                                      | 26                                     | 7%        | 0.72        | 0.55        |
| ES1270A        | 43.54              | -5.66               | -3                                     | 25                                     | -7%       | 0.56        | 0.33        |
| ES1271A        | 43.54              | -5.70               | -21                                    | 27                                     | -30%      | 0.56        | 0.43        |
| ES1285A        | 43.53              | -7.74               | 14                                     | 21                                     | 21%       | 0.52        | 0.30        |
| ES1287A        | 42.80              | -4.84               | 18                                     | 23                                     | 27%       | 0.59        | 0.57        |
| ES1297A        | 42.80              | -5.62               | 6                                      | 19                                     | 7%        | 0.67        | 0.55        |
| ES1346A        | 42.69              | -2.94               | 12                                     | 24                                     | 16%       | 0.70        | 0.64        |
| ES1349A        | 43.14              | -2.96               | 45                                     | 46                                     | 92%       | 0.60        | 0.61        |
| ES1353A        | 43.29              | -5.68               | 17                                     | 29                                     | 30%       | 0.64        | 0.45        |
| ES1358A        | 43.54              | -5.65               | -1                                     | 17                                     | -2%       | 0.69        | 0.47        |
| ES1359A        | 43.31              | -7.69               | 30                                     | 30                                     | 57%       | 0.60        | 0.51        |
| ES1424A        | 43.56              | -5.93               | 8                                      | 22                                     | 20%       | 0.58        | 0.41        |
| ES1432A        | 43.18              | -6.55               | 41                                     | 42                                     | 81%       | 0.53        | 0.59        |
| ES1439A        | 42.20              | -8.75               | 25                                     | 35                                     | 38%       | 0.62        | 0.50        |
| ES1472A        | 42.81              | -1.65               | 11                                     | 17                                     | 14%       | 0.78        | 0.73        |
| <b>ES1489A</b> | <b>42.88</b>       | <b>-3.23</b>        | <b>4</b>                               | <b>20</b>                              | <b>4%</b> | <b>0.77</b> | <b>0.68</b> |

| Station Code | Latitude (degrees) | Longitude (degrees) | MB ( $\mu\text{g}\cdot\text{m}^{-3}$ ) | ME ( $\mu\text{g}\cdot\text{m}^{-3}$ ) | NMB  | IOA  | r    |
|--------------|--------------------|---------------------|----------------------------------------|----------------------------------------|------|------|------|
| ES1490A      | 43.17              | -2.64               | 45                                     | 45                                     | 103% | 0.57 | 0.67 |
| ES1491A      | 43.41              | -2.70               | 10                                     | 16                                     | 13%  | 0.76 | 0.74 |
| ES1501A      | 43.18              | -2.27               | 38                                     | 41                                     | 66%  | 0.54 | 0.38 |
| ES1529A      | 43.47              | -3.79               | 13                                     | 15                                     | 20%  | 0.76 | 0.71 |
| ES1530A      | 43.01              | -4.14               | 24                                     | 26                                     | 35%  | 0.66 | 0.62 |
| ES1531A      | 43.15              | -4.25               | 21                                     | 24                                     | 29%  | 0.65 | 0.59 |
| ES1544A      | 42.85              | -2.39               | 16                                     | 28                                     | 21%  | 0.64 | 0.59 |
| ES1557A      | 43.26              | -8.56               | 28                                     | 31                                     | 48%  | 0.51 | 0.38 |
| ES1576A      | 43.40              | -3.84               | 37                                     | 37                                     | 84%  | 0.57 | 0.61 |
| ES1577A      | 43.42              | -3.84               | 27                                     | 28                                     | 50%  | 0.63 | 0.61 |
| ES1578A      | 43.38              | -3.22               | 20                                     | 23                                     | 35%  | 0.73 | 0.71 |
| ES1579A      | 43.26              | -4.06               | 50                                     | 50                                     | 120% | 0.53 | 0.53 |
| ES1591A      | 42.56              | -6.73               | 26                                     | 36                                     | 42%  | 0.56 | 0.46 |
| ES1598A      | 43.21              | -3.13               | 24                                     | 33                                     | 34%  | 0.63 | 0.46 |
| ES1599A      | 43.25              | -2.16               | 0                                      | 14                                     | 0%   | 0.83 | 0.74 |
| ES1651A      | 43.26              | -5.78               | 19                                     | 30                                     | 37%  | 0.65 | 0.48 |
| ES1696A      | 43.30              | -1.98               | 24                                     | 27                                     | 40%  | 0.62 | 0.59 |
| ES1697A      | 43.31              | -2.01               | 24                                     | 28                                     | 41%  | 0.60 | 0.54 |
| ES1713A      | 43.25              | -2.90               | 37                                     | 37                                     | 89%  | 0.62 | 0.64 |
| ES1740A      | 42.81              | -1.64               | 29                                     | 30                                     | 53%  | 0.61 | 0.64 |
| ES1747A      | 42.83              | -1.65               | 10                                     | 15                                     | 14%  | 0.79 | 0.74 |
| ES1749A      | 42.90              | -2.17               | 27                                     | 33                                     | 40%  | 0.57 | 0.42 |
| ES1790A      | 42.54              | -6.58               | 25                                     | 31                                     | 40%  | 0.59 | 0.51 |
| ES1867A      | 43.48              | -8.24               | 31                                     | 31                                     | 56%  | 0.46 | 0.29 |
| ES1868A      | 42.88              | -8.56               | 14                                     | 23                                     | 21%  | 0.70 | 0.56 |
| ES1901A      | 42.89              | -8.53               | 18                                     | 28                                     | 28%  | 0.63 | 0.47 |
| ES1905A      | 43.00              | -7.55               | 40                                     | 40                                     | 102% | 0.44 | 0.35 |
| ES1907A      | 43.30              | -8.51               | 25                                     | 27                                     | 61%  | 0.71 | 0.70 |
| ES1957A      | 43.38              | -8.41               | 25                                     | 25                                     | 46%  | 0.60 | 0.63 |
| ES1960A      | 43.49              | -8.25               | 18                                     | 21                                     | 27%  | 0.54 | 0.32 |
| ES1974A      | 43.52              | -5.67               | -6                                     | 20                                     | -11% | 0.76 | 0.61 |
| ES1987A      | 42.95              | -3.48               | 14                                     | 21                                     | 18%  | 0.71 | 0.57 |
| ES1988A      | 42.58              | -5.57               | 11                                     | 21                                     | 15%  | 0.76 | 0.75 |
| ES1989A      | 43.04              | -5.09               | 34                                     | 34                                     | 63%  | 0.44 | 0.08 |
| ES2014A      | 42.06              | -7.41               | 16                                     | 18                                     | 21%  | 0.61 | 0.52 |
| ES2015A      | 42.18              | -8.52               | 43                                     | 47                                     | 93%  | 0.57 | 0.55 |
| ES2049A      | 43.12              | -8.35               | 11                                     | 23                                     | 15%  | 0.69 | 0.51 |
| ES2051A      | 43.40              | -5.80               | 6                                      | 26                                     | 13%  | 0.70 | 0.55 |
| ES2054A      | 43.57              | -5.96               | 20                                     | 25                                     | 50%  | 0.70 | 0.62 |
| ES2058A      | 43.26              | -2.97               | 35                                     | 36                                     | 72%  | 0.63 | 0.65 |
| ES2075A      | 43.35              | -5.97               | 25                                     | 28                                     | 55%  | 0.70 | 0.62 |
| ES2083A      | 43.07              | -6.19               | 24                                     | 28                                     | 34%  | 0.58 | 0.53 |
| ES2085A      | 42.06              | -7.73               | 29                                     | 33                                     | 51%  | 0.57 | 0.38 |

Table S5. Statistical metrics for the selected O<sub>3</sub> measurement stations with its codification and location coordinates in Western Atlantic Iberia (WAI). The station of Douro Norte (DN) in Alvão Natural Park is highlighted in gray.

| Station Code   | Latitude (degrees) | Longitude (degrees) | MB ( $\mu\text{g}\cdot\text{m}^{-3}$ ) | ME ( $\mu\text{g}\cdot\text{m}^{-3}$ ) | NMB       | IOA         | r           |
|----------------|--------------------|---------------------|----------------------------------------|----------------------------------------|-----------|-------------|-------------|
| PT01034        | 41.22              | -8.63               | -1                                     | 21                                     | -1%       | 0.88        | 0.85        |
| PT01044        | 41.27              | -8.38               | 68                                     | 68                                     | 293%      | 0.40        | 0.48        |
| PT01047        | 41.80              | -8.70               | 40                                     | 41                                     | 78%       | 0.36        | 0.17        |
| <b>PT01048</b> | <b>41.37</b>       | <b>-7.79</b>        | <b>1</b>                               | <b>11</b>                              | <b>1%</b> | <b>0.87</b> | <b>0.79</b> |
| PT01050        | 41.15              | -8.66               | 8                                      | 22                                     | 14%       | 0.83        | 0.72        |
| PT02004        | 40.76              | -8.57               | 21                                     | 32                                     | 35%       | 0.76        | 0.82        |
| PT02016        | 40.21              | -8.41               | 7                                      | 21                                     | 9%        | 0.82        | 0.83        |
| PT02018        | 40.59              | -8.67               | 18                                     | 30                                     | 26%       | 0.75        | 0.82        |
| PT02020        | 40.23              | -7.30               | 23                                     | 26                                     | 36%       | 0.53        | 0.32        |
| PT02022        | 40.18              | -8.68               | -11                                    | 21                                     | -11%      | 0.75        | 0.78        |
| PT03063        | 38.62              | -9.08               | 14                                     | 21                                     | 22%       | 0.82        | 0.80        |
| PT03070        | 38.73              | -9.11               | 1                                      | 16                                     | 1%        | 0.85        | 0.78        |
| PT03071        | 38.77              | -9.11               | 11                                     | 20                                     | 16%       | 0.76        | 0.68        |
| PT03072        | 38.75              | -9.15               | 9                                      | 19                                     | 14%       | 0.80        | 0.73        |
| PT03082        | 38.74              | -9.21               | 9                                      | 24                                     | 13%       | 0.78        | 0.71        |
| PT03083        | 38.66              | -9.16               | 11                                     | 22                                     | 15%       | 0.81        | 0.80        |
| PT03084        | 38.75              | -9.23               | -11                                    | 16                                     | -12%      | 0.81        | 0.77        |
| PT03085        | 38.83              | -9.17               | -7                                     | 15                                     | -9%       | 0.83        | 0.76        |
| PT03087        | 38.71              | -9.21               | 3                                      | 19                                     | 4%        | 0.81        | 0.74        |
| PT03089        | 38.78              | -9.35               | -14                                    | 17                                     | -14%      | 0.77        | 0.68        |
| PT03091        | 38.70              | -9.32               | -5                                     | 15                                     | -5%       | 0.83        | 0.72        |
| PT03093        | 38.53              | -8.89               | -13                                    | 19                                     | -15%      | 0.80        | 0.77        |
| PT03095        | 38.66              | -9.07               | -4                                     | 19                                     | -5%       | 0.83        | 0.82        |
| PT03096        | 39.35              | -8.47               | -27                                    | 27                                     | -25%      | 0.66        | 0.73        |
| PT03099        | 38.64              | -8.69               | -3                                     | 15                                     | -4%       | 0.81        | 0.77        |
| PT03101        | 38.90              | -9.04               | -1                                     | 18                                     | -1%       | 0.75        | 0.66        |
| PT03102        | 39.28              | -9.25               | -14                                    | 19                                     | -15%      | 0.73        | 0.75        |
| PT04001        | 37.95              | -8.84               | -75                                    | 75                                     | -70%      | 0.40        | 0.38        |
| PT04002        | 38.08              | -8.80               | -69                                    | 76                                     | -46%      | 0.53        | 0.70        |
| PT04006        | 38.62              | -7.40               | 23                                     | 27                                     | 39%       | 0.52        | 0.42        |
| PT05007        | 37.01              | -7.93               | -7                                     | 14                                     | -7%       | 0.80        | 0.74        |
| PT05008        | 37.09              | -8.25               | -4                                     | 10                                     | -5%       | 0.87        | 0.79        |
| PT05012        | 37.31              | -7.68               | -16                                    | 17                                     | -16%      | 0.73        | 0.76        |

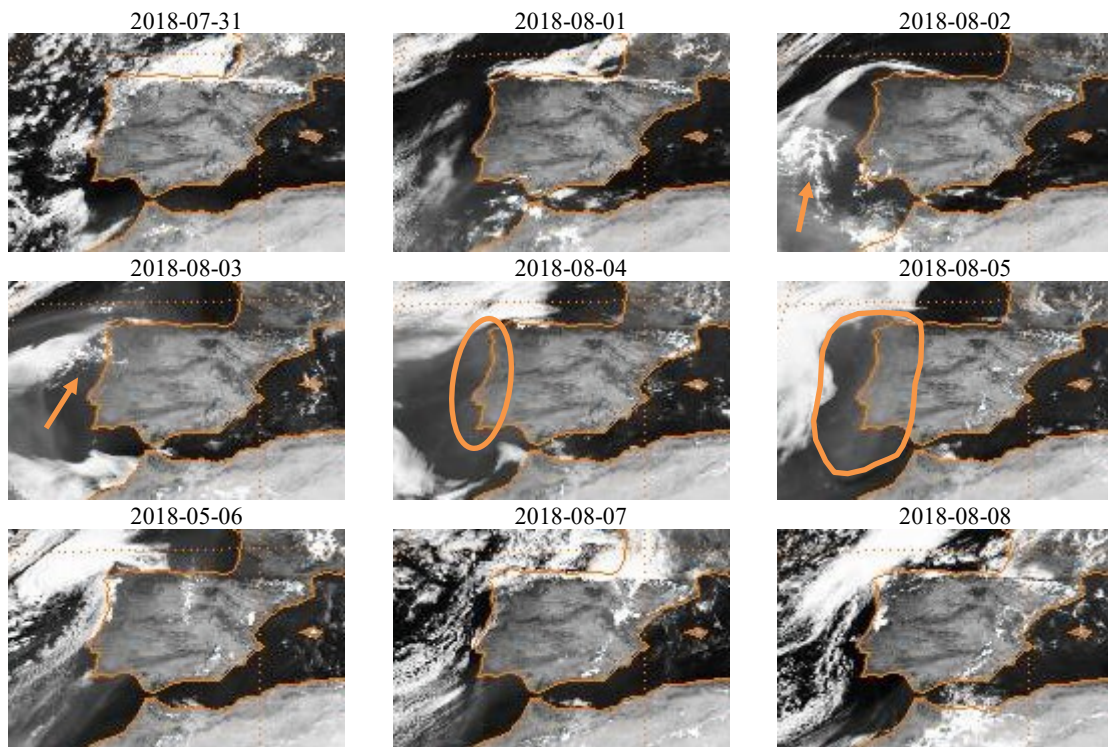

Figure S1. Satellite imagery from the Meteosat visible channel by NOAA's Global ISCCP B1 Browse System at daily 12 UTC from July 31 to August 8 (Knapp, 2008). Orange marks indicate the possible location of the Saharan dust transported to the Iberian Peninsula.

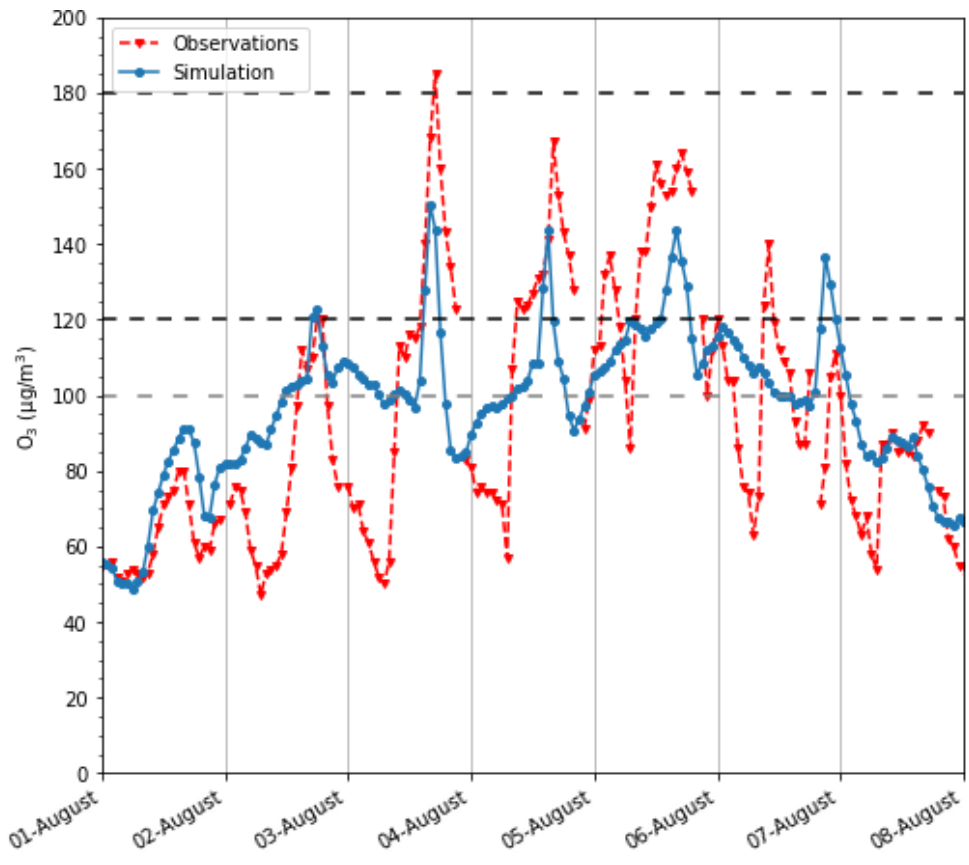

Figure S2. Comparison of the observed (red) and simulated (blue) hourly O<sub>3</sub> time series for the Valderejo Natural Park (VNP) station.



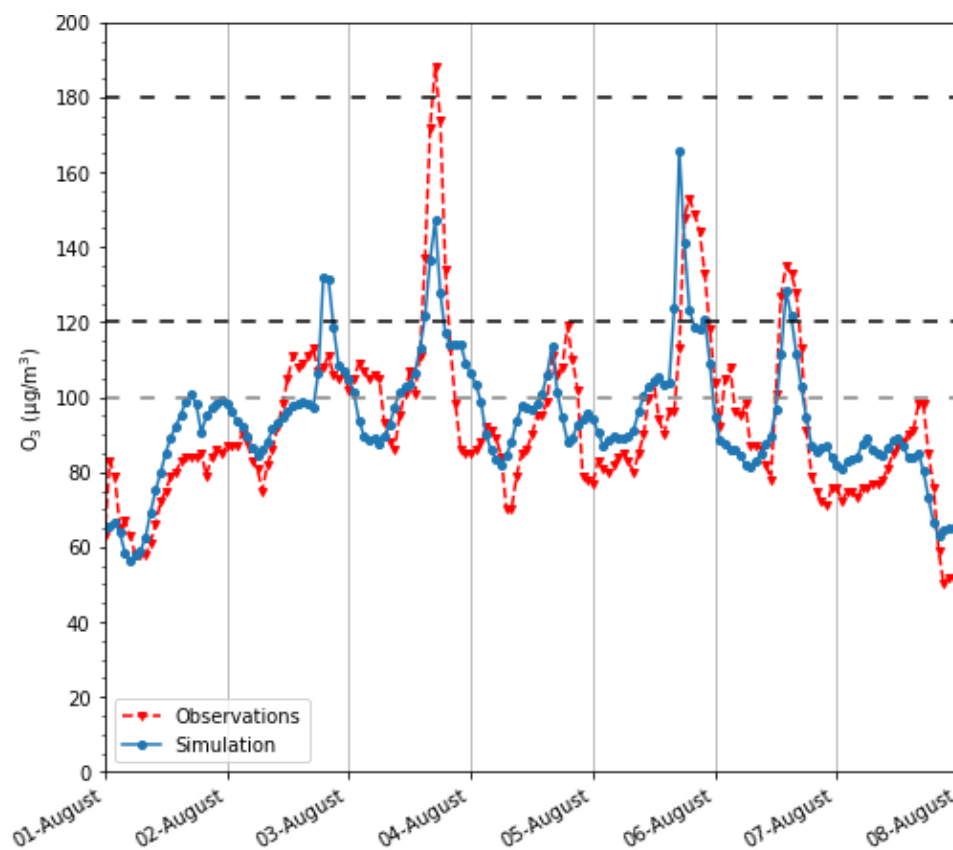

Figure S3. Comparison of the observed (red) and simulated (blue) hourly O<sub>3</sub> time series for the Douro Norte (DN) station.

## References

- Alapaty, K., Niyogi, D., Chen, F., Pyle, P., Chandrasekar, A., and Seaman, N.: Development of the Flux-Adjusting Surface Data Assimilation System for Mesoscale Models, *Journal of Applied Meteorology and Climatology*, 47(9), 2331-2350, <https://doi.org/10.1175/2008JAMC1831.1>, 2008.
- 35 Dudhia, J.: Numerical Study of Convection Observed during the Winter Monsoon Experiment Using a Mesoscale Two-Dimensional Model, *Journal of the Atmospheric Sciences*, 46(20), 3077-3107, [https://doi.org/10.1175/1520-0469\(1989\)046<3077:NSOCOD>2.0.CO;2](https://doi.org/10.1175/1520-0469(1989)046<3077:NSOCOD>2.0.CO;2), 1989.
- Hong, S. and Lim, J.: The WRF Single-Moment 6-Class Microphysics Scheme (WSM6), *Journal of the Korean Meteorological Society*, 42, 129-151, 2006.
- 40 Hong, S.-Y., Noh, Y., and Dudhia, J.: A New Vertical Diffusion Package with an Explicit Treatment of Entrainment Processes, *Monthly Weather Review*, 134, 2318-2341, <http://dx.doi.org/10.1175/MWR3199.1>, 2006.
- Knapp, K. R.: Scientific data stewardship of International Satellite Cloud Climatology Project B1 global geostationary observations, *Journal of Applied Remote Sensing*, 2, 023548, <http://doi:10.1117/1.3043461>,  
45 2008.
- Mlawer, E. J., Taubman, S. J., Brown, P. D., Iacono, M. J., and Clough, S. A.: Radiative transfer for inhomogeneous atmospheres: RRTM, a validated correlated-k model for the longwave, *Journal of Geophysical Research: Atmospheres*, 102(D14), 16663-16682, <https://doi.org/10.1029/97JD00237>, 1997.
- 50 Reynolds, R. W., Smith, T. M., Liu, C., Chelton, D. B., Casey, K. S., and Schlax., M. G.: Daily high-resolution-blended analyses for sea surface temperature, *Journal of Climate*, 20, 5473–5496, <http://doi:10.1175/JCLI-D-14-00293.1>, 2007.
